# Supplementary material
Source: PubMed Central journal article supplement (PMC2692699)
Supplement: NIHMS31495-supplement-01.pdf [file NIHMS31495-supplement-01.pdf]

## Supplemental Information

Table 1. Modified peptides identified in tryptic digests of minimally glycosylated HSA

| Observed mass for collected peptides at given % acetonitrile (ACN) in water |         |         |         |         | Predicted mass | Residues ( $\Delta$ M) | Type of modification <sup>a</sup>       | Modified residues  |
|-----------------------------------------------------------------------------|---------|---------|---------|---------|----------------|------------------------|-----------------------------------------|--------------------|
| 5% ACN                                                                      | 10% ACN | 20% ACN | 30% ACN | 50% ACN |                |                        |                                         |                    |
| 955.49                                                                      | 955.52  |         |         |         | 955.5470       | 219-225 (+80.0266)     | Argpyrimidine                           | R222               |
| 971.54                                                                      |         |         |         |         | 971.5527       | 535-541 (+162.0528)    | FL                                      | K536 or K538       |
|                                                                             |         |         |         | 1820.00 | 1819.9701      | 191-205 (+144.0423)    | FL-1 H <sub>2</sub> O or 3-DG-H1 or THP | K195, K199 or R197 |
|                                                                             |         |         |         | 2045.08 | 2045.0339      | 196-209 (+324.1057)    | 2 FL                                    | K199 & K205        |
|                                                                             |         |         |         | 2162.03 | 2162.0333      | 467-484 (+39.9949)     | G-H1                                    | R472               |
|                                                                             |         |         | 2163.06 |         | 2163.1180      | 145-160 (+108.0211)    | Pyrraline                               | K159               |
|                                                                             |         |         |         | 2466.26 | 2466.2240      | 200-218 (+270.0740)    | AFGP                                    | K205, R209 or K212 |
|                                                                             |         |         | 2612.22 |         | 2612.2423      | 160-181 (+39.9949)     | G-H1                                    | R160               |
|                                                                             |         |         |         | 2651.30 | 2651.4298      | 219-240 (+144.0423)    | FL-1 H <sub>2</sub> O or 3-DG-H1 or THP | K225, K233 or R222 |
|                                                                             |         |         |         | 2974.40 | 2974.3273      | 349-372 (+144.0423)    | FL-1 H <sub>2</sub> O                   | K351 or K359       |

<sup>a</sup>See Figure 1 for the full names and structures of these various modification classes.

## Supplemental Information

Table 2. Non-modified peptides identified in tryptic digests of minimally glycosylated HSA

| Observed mass<br>w/o<br>fractionation | Observed mass for collected peptides<br>At given % acetonitrile (ACN) in water |         |         |         |         | Predicted<br>mass <sup>a</sup> | Residues              |
|---------------------------------------|--------------------------------------------------------------------------------|---------|---------|---------|---------|--------------------------------|-----------------------|
|                                       | 5% ACN                                                                         | 10% ACN | 20% ACN | 30% ACN | 50% ACN |                                |                       |
| 673.38                                | 645.34                                                                         |         |         |         |         | 645.3572                       | 182-186               |
|                                       | 673.37                                                                         | 673.38  |         |         |         | 673.3785                       | 213-218               |
|                                       | 695.37                                                                         |         |         |         |         | 695.3364                       | 318-323               |
|                                       | 772.43                                                                         |         |         |         |         | 772.4391                       | 175-181               |
|                                       | 789.45                                                                         |         |         |         |         | 789.4723                       | 234-240               |
|                                       | 880.43                                                                         |         |         |         |         | 880.4416                       | 226-233               |
| 927.49                                | 927.49                                                                         | 927.49  | 927.49  |         |         | 927.4940                       | 138-144               |
| 933.51                                | 933.51                                                                         | 933.52  | 933.52  |         |         | 933.5192                       | 74-81                 |
| 940.44                                | 940.44                                                                         |         |         |         |         | 940.4488                       | 107-114               |
|                                       | 951.46                                                                         |         |         |         |         | 951.4424                       | 13-20                 |
| 960.56                                | 960.56                                                                         | 960.56  | 960.56  |         |         | 960.5631                       | 403-410               |
|                                       | 984.52                                                                         | 984.53  |         |         |         | 984.4891                       | 352-359               |
| 1055.60                               |                                                                                | 1000.60 |         |         |         | 1000.6044                      | 526-534               |
|                                       | 1017.52                                                                        | 1017.53 |         |         |         | 1017.5370                      | 65-73                 |
|                                       | 1055.54                                                                        | 1055.59 |         |         |         | 1055.5890                      | 137-144               |
|                                       | 1074.53                                                                        |         |         |         |         | 1074.5432                      | 182-190               |
|                                       | 1075.48                                                                        | 1075.51 |         |         |         | 1075.4995                      | 99-106                |
|                                       |                                                                                | 1128.69 |         |         |         | 1128.6992                      | 525-534               |
| 1138.53                               | 1138.49                                                                        |         |         |         |         | 1138.4984                      | 476-484               |
| 1149.61                               | 1149.61                                                                        | 1149.62 | 1149.61 |         |         | 1149.6156                      | 42-51                 |
|                                       | 1226.60                                                                        | 1226.61 |         |         |         | 1226.6058                      | 11-20                 |
| 1311.74                               |                                                                                |         |         | 1250.67 |         | 1250.6350                      | 429-439               |
|                                       |                                                                                |         | 1311.75 | 1311.75 |         | 1311.7425                      | 338-348               |
| 1342.65                               |                                                                                |         | 1342.65 | 1342.64 | 1342.62 | 1342.6352                      | 546-557               |
|                                       | 1371.54                                                                        | 1371.56 |         |         |         | 1371.5672                      | 163-174               |
|                                       | 1400.66                                                                        | 1400.66 |         |         |         | 1400.6779                      | 433-444               |
|                                       | 1434.54                                                                        | 1434.54 |         |         |         | 1434.5339                      | 82-93                 |
|                                       | 1443.62                                                                        | 1443.64 |         |         |         | 1443.6425                      | 263-274               |
| 1467.85                               |                                                                                |         | 1467.84 | 1467.84 | 1467.84 | 1467.8436                      | 337-348               |
| 1511.87                               |                                                                                | 1511.85 | 1511.85 |         |         | 1511.8434                      | 415-428               |
|                                       | 1546.72                                                                        | 1546.73 |         |         |         | 1546.7975                      | 275-286               |
|                                       | 1552.62                                                                        |         |         |         |         | 1552.5981                      | 360-372               |
| 1623.76                               |                                                                                |         |         |         | 1623.77 | 1623.7881                      | 324-336               |
|                                       | 1627.71                                                                        |         |         |         | 1627.77 | 1627.7274                      | 561-574               |
|                                       |                                                                                |         |         |         | 1639.79 | 1639.7830                      | 324-336<br>(Met-ox)   |
| 1639.94                               |                                                                                | 1639.94 | 1639.94 |         |         | 1639.9384                      | 414-428               |
| 1657.75                               |                                                                                | 1657.76 | 1657.75 | 1657.75 |         | 1657.7533                      | 390-402               |
| 1714.80                               | 1714.79                                                                        | 1714.80 |         |         |         | 1714.7972                      | 94-106                |
|                                       |                                                                                |         |         | 1742.83 | 1742.86 | 1742.8947                      | 146-159               |
| 1898.94                               |                                                                                |         |         | 1898.96 | 1898.98 | 1898.9958                      | 145-159 or<br>146-160 |
|                                       |                                                                                |         | 1910.92 | 1910.90 | 1910.90 | 1910.9322                      | 485-500               |
|                                       |                                                                                |         |         | 1932.03 |         | 1932.0378                      | 65-81                 |
| 2045.09                               |                                                                                |         | 2045.12 | 2045.10 | 2045.08 | 2045.0961                      | 373-389               |
| 2086.85                               | 2086.87                                                                        | 2086.84 | 2086.84 |         |         | 2086.8379                      | 241-257               |
| 2260.04                               |                                                                                |         |         | 2260.03 | 2260.02 | 2260.0232                      | 501-519               |

**Table 2.** Non-modified peptides identified in tryptic digests of minimally glycosylated HSA (Cont'd)

| Observed mass<br>w/o<br>fractionation | Observed mass for collected peptides<br>At given % acetonitrile (ACN) in water |         |         |         |         | Predicted<br>mass <sup>a</sup> | Residues            |
|---------------------------------------|--------------------------------------------------------------------------------|---------|---------|---------|---------|--------------------------------|---------------------|
|                                       | 5% ACN                                                                         | 10% ACN | 20% ACN | 30% ACN | 50% ACN |                                |                     |
|                                       |                                                                                |         |         | 2289.00 |         | 2289.0717                      | 542-560             |
|                                       |                                                                                | 2305.10 |         | 2305.07 |         | 2305.0666                      | 542-560<br>(Met-ox) |
|                                       |                                                                                |         |         |         |         | 2490.2894                      | 2490.2856           |
|                                       |                                                                                |         |         |         |         | 2518.2383                      | 2518.2144           |
|                                       |                                                                                | 2650.28 |         | 2650.27 |         | 2650.2645                      | 115-136             |
|                                       |                                                                                |         |         |         | 2674.32 | 2674.3155                      | 445-466             |
|                                       |                                                                                |         |         | 2778.38 |         | 2778.3595                      | 115-137             |
|                                       |                                                                                |         |         | 2974.43 | 2974.40 | 2974.3449                      | 287-313             |

## Supplemental Information

Table 3. Modified peptides identified in Glu-C digests of minimally glycosylated HSA

| Observed mass for collected peptides<br>at given % acetonitrile (ACN) in water <sup>a</sup> |         |         |         |         | Predicted<br>mass | Residues<br>( $\Delta M$ ) | Type of<br>modification <sup>a</sup> | Modified residues  |
|---------------------------------------------------------------------------------------------|---------|---------|---------|---------|-------------------|----------------------------|--------------------------------------|--------------------|
| 5% ACN                                                                                      | 10% ACN | 20% ACN | 30% ACN | 50% ACN |                   |                            |                                      |                    |
| 858.45                                                                                      |         |         |         |         | 858.4614          | 377-382<br>(+126.0317)     | FL-2 H <sub>2</sub> O                | K378               |
| 933.46                                                                                      |         |         |         |         | 933.4934          | 377-383<br>(+72.0211)      | CEL                                  | K378               |
| 1130.56                                                                                     | 1130.56 |         |         |         | 1130.5152         | 286-294<br>(+58.0055)      | CML                                  | K286               |
|                                                                                             |         |         | 1166.58 |         | 1166.5039         | 49-57<br>(+126.0317)       | FL-2 H <sub>2</sub> O                | K51                |
| 1348.72                                                                                     |         |         |         |         | 1348.7042         | 133-141<br>(+144.0423)     | FL-1 H <sub>2</sub> O                | K136 or K137       |
| 1434.79                                                                                     |         |         |         |         | 1434.8319         | 572-585<br>(+108.0211)     | Pyrraline                            | K573 or K574       |
|                                                                                             |         | 1462.75 |         |         | 1462.7178         | 7-17<br>(+162.0528)        | FL                                   | K12                |
|                                                                                             |         |         | 1866.99 |         | 1867.0006         | 154-167<br>(+162.0528)     | FL                                   | K159 or K162       |
| 2118.07                                                                                     | 2118.05 |         |         |         | 2118.0436         | 426-442<br>(+162.0528)     | FL                                   | K432, K436 or K439 |
|                                                                                             |         | 2194.16 |         |         | 2194.0856         | 377-393<br>(+108.0211)     | Pyrraline                            | K378 or K389       |
|                                                                                             |         |         | 2548.33 |         | 2548.1845         | 168-188<br>(+72.0211)      | CEL                                  | K174 or K181       |

<sup>a</sup>See Figure 1 for the full names and structures of these various modification classes.

## Supplemental Information

Table 4. Non-modified peptides identified in Glu-C digests of minimally glycosylated HSA

| Observed mass<br>w/o<br>fractionation | Observed mass for collected peptides<br>At given % acetonitrile (ACN) in water |         |         |         |         | Predicted<br>mass | Residues            |
|---------------------------------------|--------------------------------------------------------------------------------|---------|---------|---------|---------|-------------------|---------------------|
|                                       | 5% ACN                                                                         | 10% ACN | 20% ACN | 30% ACN | 50% ACN |                   |                     |
| 962.48                                | 962.46                                                                         |         |         |         |         | 962.4552          | 443-450             |
|                                       |                                                                                | 978.48  |         |         |         | 978.4501          | 443-450<br>(Met-ox) |
| 1031.46                               | 1031.44                                                                        | 1031.44 |         |         |         | 1031.4507         | 369-376             |
|                                       | 1197.56                                                                        | 1197.56 |         |         |         | 1197.5792         | 496-505             |
| 1204.65                               |                                                                                |         |         | 1204.66 |         | 1204.6619         | 133-141             |
|                                       | 1213.53                                                                        |         |         |         |         | 1213.5522         | 312-321             |
|                                       | 1278.79                                                                        |         |         |         |         | 1278.7900         | 532-542             |
| 1300.67                               | 1300.66                                                                        | 1300.66 | 1300.66 |         |         | 1300.665          | 7-17                |
|                                       | 1313.79                                                                        | 1313.79 |         |         |         | 1313.7907         | 521-531             |
| 1326.80                               |                                                                                |         |         |         |         | 1326.8108         | 572-585             |
| 1519.78                               | 1519.79                                                                        | 1519.78 | 1519.78 | 1519.78 |         | 1519.781          | 142-153             |
|                                       | 1541.77                                                                        | 1541.77 | 1541.77 |         |         | 1541.6946         | 506-518             |
| 1548.80                               | 1548.77                                                                        | 1548.81 | 1548.80 | 1548.80 |         | 1548.7956         | 480-492             |
| 1566.65                               |                                                                                | 1566.62 |         |         |         | 1566.6203         | 120-132             |
| 1583.78                               |                                                                                |         |         | 1583.83 |         | 1583.7883         | 543-556             |
|                                       | 1680.80                                                                        | 1680.81 |         |         |         | 1680.8049         | 466-479             |
| 1699.77                               |                                                                                |         | 1699.75 |         |         | 1699.7418         | 253-266             |
| 1704.95                               | 1704.96                                                                        |         | 1704.96 | 1704.95 | 1704.95 | 1704.9478         | 154-167             |
| 1737.71                               | 1737.69                                                                        | 1737.71 |         |         |         | 1737.6994         | 87-100              |
| 1801.89                               |                                                                                |         |         |         | 1801.90 | 1801.9158         | 451-465             |
| 1955.99                               | 1955.99                                                                        | 1955.98 |         |         |         | 1955.9908         | 426-442             |
| 2086.06                               |                                                                                |         | 2086.06 | 2086.09 |         | 2086.0645         | 377-393             |
| 2194.20                               |                                                                                | 2194.12 | 2194.16 |         |         | 2194.1768         | 189-208             |
| 2232.25                               |                                                                                |         | 2232.21 | 2232.25 | 2232.25 | 2232.2518         | 209-227             |
| 2348.20                               |                                                                                |         | 2348.19 | 2348.24 |         | 2348.1934         | 101-119             |
| 2563.43                               |                                                                                |         |         |         | 2563.38 | 2563.4149         | 334-354             |
| 2578.31                               |                                                                                |         |         | 2578.31 |         | 2578.2758         | 61-82               |
|                                       |                                                                                |         |         |         | 2745.31 | 2745.3526         | 443-465             |
|                                       |                                                                                |         |         | 2922.59 |         | 2922.6459         | 401-425             |
|                                       |                                                                                |         |         |         | 3334.62 | 3334.7299         | 18-45               |

## Supplemental Information

Table 5. Modified peptides identified in Lys-C digests of minimally glycosylated HSA

| Observed mass for collected peptides<br>at given % acetonitrile (ACN) in water |         |         |         |         | Predicted<br>mass | Residues<br>( $\Delta M$ ) | Type of<br>modification <sup>a</sup> | Modified<br>residues |
|--------------------------------------------------------------------------------|---------|---------|---------|---------|-------------------|----------------------------|--------------------------------------|----------------------|
| 5% ACN                                                                         | 10% ACN | 20% ACN | 30% ACN | 50% ACN |                   |                            |                                      |                      |
|                                                                                | 873.52  |         |         |         | 873.5159          | 520-525<br>(+72.0211)      | CEL                                  | K524 or K525         |
|                                                                                |         |         | 2527.38 |         | 2527.3574         | 206-225<br>(+162.0528)     | FL                                   | K212 or K225         |

<sup>a</sup>See Figure 1 for the full names and structures of these various modification classes.

## Supplemental Information

Table 6. Non-modified peptides identified in Lys-C digests of minimally glycosylated HSA

| Observed mass<br>w/o<br>fractionation | Observed mass for collected peptides<br>at given % acetonitrile (ACN) in water |         |         |         |           | Predicted<br>mass <sup>a</sup> | Residues            |
|---------------------------------------|--------------------------------------------------------------------------------|---------|---------|---------|-----------|--------------------------------|---------------------|
|                                       | 5% ACN                                                                         | 10% ACN | 20% ACN | 30% ACN | 50% ACN   |                                |                     |
| 673.42                                | 599.39                                                                         |         |         |         |           | 599.3768                       | 282-286             |
|                                       | 673.40                                                                         |         |         |         |           | 673.3997                       | 520-524             |
|                                       | 772.44                                                                         |         |         |         |           | 772.4391                       | 175-181             |
|                                       | 784.39                                                                         |         |         |         |           | 784.3881                       | 373-378             |
| 854.46                                | 789.47                                                                         |         |         |         |           | 789.4721                       | 234-240             |
|                                       | 854.46                                                                         | 854.45  | 854.48  |         |           | 854.4525                       | 206-212             |
|                                       | 880.45                                                                         |         |         |         |           | 880.4416                       | 226-233             |
|                                       | 951.44                                                                         |         |         |         |           | 951.4424                       | 13-20               |
| 973.54                                | 973.52                                                                         | 973.52  |         |         |           | 973.5219                       | 5-12                |
|                                       | 1000.58                                                                        | 1000.59 |         |         |           | 1000.6044                      | 526-534             |
|                                       | 1002.57                                                                        |         |         |         |           | 1002.5583                      | 467-475             |
|                                       | 1017.54                                                                        | 1017.53 | 1017.55 |         |           | 1017.5370                      | 65-73               |
|                                       | 1070.46                                                                        |         |         |         |           | 1070.4464                      | 565-573             |
|                                       | 1074.54                                                                        |         |         |         |           | 1074.5431                      | 182-190             |
| 1149.61                               | 1128.70                                                                        |         |         |         |           | 1128.6994                      | 525-534             |
|                                       | 1149.61                                                                        | 1149.61 | 1149.62 |         |           | 1149.6156                      | 42-51               |
|                                       | 1198.54                                                                        |         |         |         |           | 1198.5414                      | 565-574             |
|                                       | 1279.71                                                                        | 1279.71 | 1279.71 |         |           | 1279.7261                      | 379-389             |
| 1342.63                               | 1342.64                                                                        | 1342.64 | 1342.63 | 1342.63 | 1342.6352 | 546-557                        |                     |
| 1352.77                               | 1352.76                                                                        | 1352.77 | 1352.77 | 1352.77 |           | 1352.7691                      | 403-413             |
|                                       | 1371.56                                                                        | 1371.57 |         |         |           | 1371.5672                      | 163-174             |
|                                       | 1443.64                                                                        | 1443.66 |         |         |           | 1443.6425                      | 263-274             |
|                                       |                                                                                |         | 1480.84 |         |           | 1480.8641                      | 403-414             |
| 1529.87                               | 1529.87                                                                        | 1529.87 | 1529.87 | 1529.87 | 1529.86   | 1529.8705                      | 213-225             |
|                                       | 1552.60                                                                        |         |         |         |           | 1552.5981                      | 360-372             |
| 1657.75                               | 1657.75                                                                        | 1657.76 | 1657.74 | 1657.75 |           | 1657.7533                      | 390-402             |
| 1714.78                               | 1714.80                                                                        | 1714.80 | 1714.78 |         |           | 1714.7972                      | 94-106              |
| 1827.94                               | 1827.97                                                                        | 1827.95 | 1827.93 |         |           | 1827.9640                      | 175-190             |
| 1924.07                               |                                                                                | 1924.08 | 1924.06 | 1924.08 |           | 1924.0869                      | 415-432             |
| 2045.10                               |                                                                                |         | 2045.05 | 2045.12 |           | 2045.0961                      | 373-389             |
| 2052.16                               | 2052.20                                                                        |         | 2052.15 |         |           | 2052.1819                      | 414-432             |
|                                       |                                                                                |         |         | 2067.10 |           | 2067.1287                      | 196-212             |
|                                       |                                                                                |         | 2075.91 |         |           | 2075.8836                      | 558-574             |
| 2260.02                               |                                                                                |         |         | 2260.07 | 2260.03   | 2260.0232                      | 501-519             |
| 2349.03                               |                                                                                |         | 2348.98 | 2349.04 | 2349.06   | 2349.0347                      | 74-93               |
| 2391.27                               |                                                                                |         |         | 2391.37 |           | 2391.2937                      | 213-233             |
| 2490.22                               |                                                                                |         |         |         | 2490.26   | 2490.2856                      | 21-41               |
| 2585.10                               | 2585.10                                                                        | 2585.11 | 2585.06 |         |           | 2585.1181                      | 241-262             |
| 2674.30                               |                                                                                |         |         | 2674.35 | 2674.32   | 2674.3155                      | 445-466             |
|                                       |                                                                                |         |         |         | 2690.33   | 2690.3104                      | 445-466<br>(Met-ox) |
| 2807.44                               |                                                                                |         |         | 2807.47 | 2807.47   | 2807.4714                      | 138-159             |
| 2935.58                               |                                                                                |         |         | 2935.59 | 2935.57   | 2935.5664                      | 137-159             |
| 2974.34                               |                                                                                |         |         | 2974.41 | 2974.41   | 2974.3449                      | 287-313             |
| 3030.50                               |                                                                                |         |         | 3030.57 |           | 3030.4122                      | 476-500             |
